# Supplementary material
Source: PubMed Central journal article supplement (PMC3791734)
Supplement: 1315292110_pnas.201315292SI.pdf [file 1315292110_pnas.201315292SI.pdf]

# Supporting Information

Wang et al. 10.1073/pnas.1315292110

## SI Materials and Methods

**Mice.** Genotypes were assayed by PCR using Takara Ex Taq DNA Polymerase (Takara Bio). The wild-type *Angptl8* allele was detected using the following oligonucleotides: 5'-AAACCCAGAACAGAGGAAAC-3' (sense) and 5'-CCTTTATTCCAGTGCTAGG-3' (antisense) to amplify a 518-bp fragment; for the mutated allele, 5'-CCTATCCCATTACGGTCAATC-3' (sense) and 5'-TGATTTGTAGTCCGGTTTATG-3' (antisense) in the LacZ gene were used to amplify a 357-bp fragment. The amplification products were size-fractionated on 2% (wt/vol) agarose gels and visualized by UV illumination after staining with ethidium bromide.

**Indirect Calorimetry.** For measurements of energy homeostasis, mice were acclimated in metabolic cages (TSE Systems; LabMaster System) for 3 d before data collection. Indirect calorimetry O<sub>2</sub> consumption and CO<sub>2</sub> production, food intake, water intake, and physical activity were monitored for 1 min at 30-min intervals for 5 consecutive days. Body composition was determined by nuclear magnetic resonance using a minispec analyzer (Brucker).

**Core Body Temperature.** Core body temperature was measured using an implantable temperature sensor (temperature transponder; IPTT-300; Bio Medic Data Systems) according to the manufacturer's instructions. Mice were anesthetized with isoflurane and the transponder was implanted under the skin on the back. Temperature was recorded 1 d later.

**Blood and Tissue Chemistries.** Plasma and tissue lipids were measured using commercial reagents as described in *Materials and Methods*. Venous blood was collected in EDTA tubes from the retroorbital plexus or the tail vein, and plasma lipids were measured using enzymatic assays. Plasma was isolated by centrifugation (4,000 rpm) for 10 min. Plasma triglyceride (TG), cholesterol, and glucose levels were measured using the Vitros 250 System (GMI). Nonesterified fatty acids (NEFAs) were measured by use of an HR Series NEFA-HR Kit (Wako Diagnostics).

Tissues were collected and immediately frozen in liquid nitrogen and stored at -80 °C until analysis. Lipids were extracted (1) and then measured using enzymatic assays [TG and cholesterol by Infinity (Thermo Scientific) and phosphatidylcholine by Phospholipid C Kit (Wako)] and normalized to wet tissue weight. In some experiments, plasma was separated by FPLC using a Superose 6 column (GE Healthcare), and the cholesterol and TG content of each fraction was measured enzymatically (Infinity; Thermo Scientific).

**Whole-Transcriptome Sequencing.** Total RNA was extracted from livers of 10-wk-old male C57BL/6 mice ( $n = 3$  per group) using the Qiagen RNeasy Midi Kit. The samples were pooled and the RNA integrity and quantity were determined using an Agilent 2100 Bioanalyzer and Qubit 2.0 fluorometer from Invitrogen. Poly(A)-based library preparation was carried out using TruSeq RNA Sample Preparation Kit version 2 (RS-122-2001) according to the manufacturer's instructions. Four micrograms of total RNA for each sample was used for oligo(dT)-based poly(A) mRNA selection followed by divalent cation thermal mRNA fragmentation. Single-stranded cDNA was synthesized using reverse transcriptase (SuperScript II) and random primers. cDNA was converted into double-stranded DNA using the reagents supplied in the kit, and the resulting dsDNA was end-repaired and the 3' ends were adenylated. Indexed adapters were ligated to the samples to enable multiplexed sequencing. After quantitative PCR, cluster generation was performed on a cBot

(Illumina) and then the samples were sequenced on the Illumina HiSeq 2000 using standard 100 × 100 paired-end sequencing. Raw sequence files were produced (.fastq files) and demultiplexed using CASAVA ([http://support.illumina.com/sequencing/sequencing\\_software/casava.ilmm](http://support.illumina.com/sequencing/sequencing_software/casava.ilmm)). Quality control metrics were generated for each sample using FASTQC (<http://www.bioinformatics.babraham.ac.uk/projects/fastqc/>). Reads were then mapped and aligned to the reference genome using TOPHAT (<http://tophat.cbcb.umd.edu/>). The mapped reads were quality-filtered using SAMTOOLS (<http://samtools.sourceforge.net/>), and the duplicates were marked but not removed using PICARD (<http://picard.sourceforge.net/>). Transcript assembly was performed using CUFFLINKS (<http://cufflinks.cbcb.umd.edu/>) and expression values were calculated. Differential expression between samples was calculated using CUFFDIFF (<http://cufflinks.cbcb.umd.edu/>). Transcript levels are expressed as fragments per kilobase of exon per million fragments mapped (2).

**Lipase Assays.** Postheparin plasma was collected 15 min after heparin (Sigma) injection (1 U/g). Total TG lipase activity was determined by incubating 5 μL of pre- and postheparin plasma from each mouse with a glycerol-stabilized emulsion composed of 9,10-<sup>3</sup>H]triolein (American Radiolabeled Chemicals), triolein, and phosphatidylcholine (3) at 37 °C for 1 h. The reaction was stopped by adding 3.25 mL of heptane:chloroform:methanol (1:1.25:1.41) followed by 0.1 M K<sub>2</sub>CO<sub>3</sub> (pH 10.5) (1 mL). Samples were vortexed for 30 s and then centrifuged at 1,800 × g for 15 min. A 1-mL aliquot of the upper phase was placed in a scintillation counter and the amount of free fatty acids liberated was calculated as described (4).

To separate hepatic lipase (HL) and lipoprotein lipase (LPL) activity, 500 μL of pooled postheparin plasma was loaded onto a 1.0-mL heparin-Sepharose HiTrap column (GE Healthcare) that had been equilibrated with 0.25 M NaCl, 20% glycerol, 1% BSA, 10 mM sodium phosphate (pH 6.5). The column was washed with 10 mL of the equilibration buffer and eluted with a 30-mL NaCl gradient [0.25–1.5 M in 20% (vol/vol) glycerol, 1% (wt/vol) BSA, 10 mM sodium phosphate, pH 6.5] (5). Forty microliters of each fraction was assayed for lipolytic activity in a total of 200 μL of reaction system.

**Preparation of Radiolabeled Very Low Density Lipoprotein.** Wild-type male mice ( $n = 12$ ) were injected with 0.1 mCi of [9,10-<sup>3</sup>H]palmitic acid (American Radiolabeled Chemicals) complexed with 2 mg/mL BSA in 200 μL of saline via the tail vein. Blood was collected 25 min after injection, plasma was pooled, and very low density lipoprotein (VLDL) was isolated by ultracentrifugation (200,000 × g, 24 h, 4 °C) at a density of 1.006. Analysis of VLDL lipids by TLC on silica gel G plates (Macherry-Nagel) confirmed that more than 90% of total counts in labeled VLDL were in the TG fraction.

**Immunoblot Analysis.** Serum from the mice was diluted 10-fold in saline and then incubated at 95 °C for 5 min in sample buffer [31 mM Tris-Cl, pH 6.8, 1% (wt/vol) SDS, 12.5% (vol/vol) glycerol]. A total of 2 μL of plasma was size-fractionated on a 10% SDS-polyacrylamide gel and transferred to nitrocellulose (GE Healthcare) before incubation overnight at 4 °C with a goat anti-mouse ANGPTL3 polyclonal antibody (1:1,000) (R&D Systems; AF136) in PBST (Sigma) plus 5% (wt/vol) fat-free milk. The filter was then washed in PBST for 10 min thrice before adding HRP-conjugated bovine anti-goat IgG (1:5,000) (Jackson ImmunoResearch) in phosphate-buffered saline with TWEEN-20 plus 5% fat-free milk. After a 1-h incubation at room temperature, the





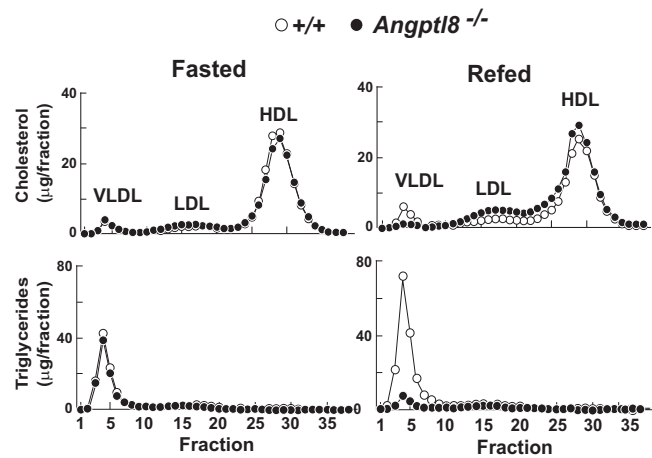

**Fig. 53.** Lipid levels in fasted and re-fed *Angptl8*<sup>-/-</sup> and wild-type mice. Plasma samples obtained from wild-type and *Angptl8*<sup>-/-</sup> mice after fasting and in the fed state (obtained from the mice shown in Fig. 2B) were subjected to FPLC on a Superose 6 column. The cholesterol and TG contents of each fraction were determined enzymatically (Infinity; Thermo Scientific).

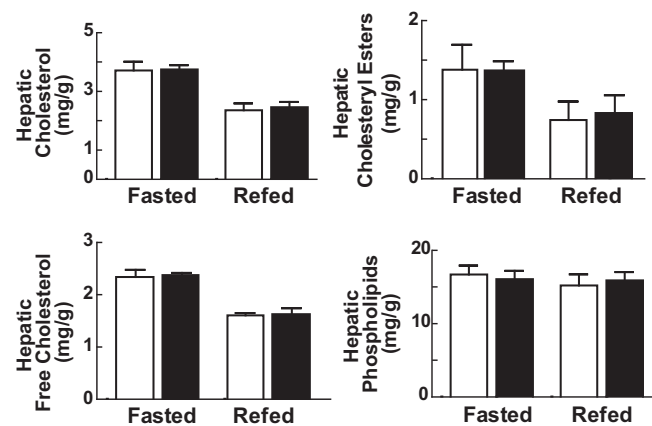

**Fig. 54.** Hepatic lipid levels in fasted and re-fed *Angptl8*<sup>-/-</sup> and wild-type mice. Liver samples from the mice described in the figure legend for Fig. 2B. The mice were entrained for 3 d using a regimen in which food was withdrawn during the day (7:00 AM to 7:00 PM) and replaced at night (7:00 PM to 7:00 AM). Livers were removed and lipids were extracted as described in *Materials and Methods*. Levels of free and esterified cholesterol and phospholipids were measured enzymatically as described in *Materials and Methods*. The experiments shown here were repeated with similar results. Values are means  $\pm$  SEM.
